# Supplementary material for: Reactivity of cyclic sulfamidates towards phosphonate-stabilised enolates: synthesis and applications of α-phosphono lactams
Source: Royal Society of Chemistry journal article supplement (doi:10.1039/b706315f), 2007-01-01
Supplement: b706315f.pdf [file b706315f.pdf]

## Electronic Supporting Information

### Reactivity of Cyclic Sulfamidates towards Phosphonate-Stabilised Enolates: Synthesis and Applications of $\alpha$ -Phosphono Lactams

John F. Bower, Andrew J. Williams, Hannah L. Woodward, Peter Szeto, Ron M. Lawrence,  
and Timothy Gallagher

**(3R,4S,5S)-Diethyl(1,5-dimethyl-4-phenylpyrrolidin-2-on-3-yl)phosphonate (15):** To a suspension of NaH (60 % dispersion in mineral oil, 160 mg, 4.00 mmol) in anhydrous DMF (10 mL) was added triethyl phosphonoacetate **3** (0.80 mL, 4.00 mmol) and the mixture was stirred for 15 minutes. Cyclic sulfamidate **10** (455 mg, 2.00 mmol) was added and the mixture was heated at 100 °C overnight. The mixture was cooled to r.t., aq. 5 M HCl (1.0 mL) was added and the mixture was stirred at r.t. for 6 h. The solution was then neutralised with saturated aq. NaHCO<sub>3</sub> and was diluted with Et<sub>2</sub>O (30 mL). The phases were separated and the aqueous portion was extracted with Et<sub>2</sub>O (2 × 30 mL). The combined organic extracts were dried (Na<sub>2</sub>SO<sub>4</sub>) and concentrated *in vacuo*. Purification by FCC (EtOAc) afforded phosphonate **15** (202 mg, 31 %) as a colourless oil;  $[\alpha]_D^{20} +5$  (c = 1, CHCl<sub>3</sub>);  $\nu_{\max}$  /cm<sup>-1</sup> (film) 2980 (m), 2931 (m), 1693 (s), 1396 (m), 1248 (s), 1030 (s), 969 (s), 761 (m), 702 (m);  $\delta_H$  (400 MHz, CDCl<sub>3</sub>) 1.11 (3H, t, *J* = 7.0, OCH<sub>2</sub>CH<sub>3</sub>), 1.28 (3H, t, *J* = 7.0, OCH<sub>2</sub>CH<sub>3</sub>), 1.32 (3H, d, *J* = 6.5, C5-CH<sub>3</sub>), 2.89 (3H, s, NCH<sub>3</sub>), 3.12 (1H, dd, *J* = 23.0 and 9.0, C3-H), 3.30 (1H, ddd, *J* = 18.0, 9.0 and 6.5, C4-H), 3.52 (1H, dq, *J* = 6.5 and 6.5, C5-H), 3.86-4.06 (2H, m, OCH<sub>2</sub>CH<sub>3</sub>), 4.17-4.27 (2H, m, OCH<sub>2</sub>CH<sub>3</sub>), 7.22-7.37 (5H, m, ArCH);  $\delta_C$  (75 MHz, CDCl<sub>3</sub>) 16.0 (d, <sup>3</sup>*J*<sub>PC</sub> = 7.0, OCH<sub>2</sub>CH<sub>3</sub>), 16.4 (d, <sup>3</sup>*J*<sub>PC</sub> = 7.0, OCH<sub>2</sub>CH<sub>3</sub>), 18.6 (C5-CH<sub>3</sub>), 27.8 (NCH<sub>3</sub>), 48.3 (C-4), 49.3 (d, <sup>1</sup>*J*<sub>PC</sub> = 144.5, C-3), 62.0 (d, <sup>2</sup>*J*<sub>PC</sub> = 6.5, OCH<sub>2</sub>CH<sub>3</sub>), 62.9 (d, <sup>3</sup>*J*<sub>PC</sub> = 10.0, C-5), 63.4 (d, <sup>2</sup>*J*<sub>PC</sub> = 6.5, POCH<sub>2</sub>CH<sub>3</sub>), 127.4, 127.5 and 128.9 (ArCH × 5), 141.3 (d, <sup>5</sup>*J*<sub>PC</sub> = 4.5, ArC), 168.3 (d, <sup>2</sup>*J*<sub>PC</sub> = 2.5, C-2); *m/z* (CI<sup>+</sup>) 326 ([M+H]<sup>+</sup>, 100 %); HRMS: (CI<sup>+</sup>) Found: [M+H]<sup>+</sup> 326.1514, C<sub>16</sub>H<sub>25</sub>NO<sub>4</sub>P requires 326.1521.

**(3R,4S,5S)-Diisopropyl(1,5-dimethyl-2-oxo-4-phenylpyrrolidin-3-yl)phosphonate (17):** To a solution of diisopropyl ethyl phosphonoacetate **4** (219  $\mu$ L, 0.92 mmol) in anhydrous *p*-dioxane (4.0 mL) was added *t*-BuOK (103 mg, 0.92 mmol) and the mixture was stirred at r.t. for 30 minutes to form a colourless solution. Cyclic sulfamidate **10** (100 mg, 0.44 mmol) was added and the mixture was heated at reflux for 18 h. After cooling to r.t., aq. 5 M HCl (0.46 mL) was added and the mixture was stirred at r.t. for 3 h. The mixture was neutralised with saturated aq. NaHCO<sub>3</sub> and then concentrated *in vacuo*. The residue was dissolved in brine (20 mL) and CH<sub>2</sub>Cl<sub>2</sub> (15 mL), the organic portion was isolated and the aqueous portion was extracted with CH<sub>2</sub>Cl<sub>2</sub> (2 × 15 mL). The combined organic extracts were dried (Na<sub>2</sub>SO<sub>4</sub>) and concentrated *in vacuo* to afford a pale yellow oil. This residue was purified by FCC (EtOAc-MeOH 1:0 – 9:1) to afford phosphonate **17** (97 mg, 63 %) as a colourless oil;  $[\alpha]_D^{20} +13.0$  (c = 0.9, CHCl<sub>3</sub>);  $\nu_{\max}$  /cm<sup>-1</sup> (film) 2977 (m), 2933 (m), 1689 (s), 1375 (m), 1238 (s), 1105 (s);  $\delta_H$  (270 MHz, CDCl<sub>3</sub>) 1.13-1.35 (15H, m, OCH(CH<sub>3</sub>)<sub>2</sub> and C5-CH<sub>3</sub>), 2.88 (3H, d, *J* = 1.5, NCH<sub>3</sub>), 3.06 (1H, dd, *J* = 23.0 and 8.0, C3-H), 3.26 (1H, ddd, *J* = 19.0, 8.0 and 6.5, C4-H), 3.47 (1H, dq, *J* = 7.5 and 6.5, C5-H), 4.65 (1H, d septet, *J* = 7.5 and 6.0, OCH(CH<sub>3</sub>)<sub>2</sub>), 4.86 (1H, d septet, *J* = 7.5 and 6.0, OCH(CH<sub>3</sub>)<sub>2</sub>), 7.18-7.38 (5H, m, ArCH);  $\delta_C$  (100 MHz, CDCl<sub>3</sub>) 18.6 (C5-CH<sub>3</sub>), 23.5-23.9 (m, OCH(CH<sub>3</sub>)<sub>2</sub> × 4), 24.3 (NCH<sub>3</sub>), 48.5 (C-4), 50.0 (d, <sup>1</sup>*J*<sub>PC</sub> = 147.0, C-3), 62.9 (d, <sup>3</sup>*J*<sub>PC</sub> = 8.5, C-5), 70.7 (d, <sup>2</sup>*J*<sub>PC</sub> = 6.5, OCH(CH<sub>3</sub>)<sub>2</sub>), 71.9 (d, <sup>2</sup>*J*<sub>PC</sub> = 6.5, OCH(CH<sub>3</sub>)<sub>2</sub>), 127.2, 127.5 and 128.7 (ArCH × 5), 142.0 (d, <sup>3</sup>*J*<sub>PC</sub> = 5.5, ArC), 168.5 (d, <sup>2</sup>*J*<sub>PC</sub> = 3.5, C-2);  $\delta_P$  (162 MHz, CDCl<sub>3</sub>) 21.6; *m/z* (CI<sup>+</sup>) 354 ([M+H]<sup>+</sup>, 100 %); HRMS: (CI<sup>+</sup>) Found: [M+H]<sup>+</sup> 354.1817, C<sub>18</sub>H<sub>29</sub>NO<sub>4</sub>P requires 354.1834.

**(3R,4S,5R)-Diisopropyl(1,5-dimethyl-2-oxo-4-phenylpyrrolidin-3-yl)phosphonate**

**(18):** To a solution of diisopropyl ethyl phosphonoacetate **4** (219  $\mu$ L, 0.92 mmol) in anhydrous *p*-dioxane (4.0 mL) was added *t*-BuOK (103 mg, 0.92 mmol) and the mixture was stirred at r.t. for 20 minutes to form a colourless solution. Cyclic sulfamidate **11** (100 mg, 0.44 mmol) was added and the mixture was heated at reflux for 14.5 h. After cooling to r.t., aq. 5 M HCl (0.46 mL) was added and the mixture was stirred at r.t. for 3 h. The mixture was neutralised with saturated aq. NaHCO<sub>3</sub> and then concentrated *in vacuo*. The residue was dissolved in brine (20 mL) and CH<sub>2</sub>Cl<sub>2</sub> (15 mL), the organic portion was isolated and the aqueous portion was extracted with CH<sub>2</sub>Cl<sub>2</sub> (2  $\times$  15 mL). The combined organic extracts were dried (Na<sub>2</sub>SO<sub>4</sub>) and concentrated *in vacuo* to afford a pale yellow oil. This residue was dissolved in PhMe (5 mL) and heated at reflux for 2 h. The mixture was cooled to r.t., concentrated *in vacuo* and purified by FCC (EtOAc-MeOH 1:0 – 9:1) to afford phosphonate **18** (84 mg, 54 %) as a colourless solid; m.p. 71–73 °C (CH<sub>2</sub>Cl<sub>2</sub>-hexanes); [ $\alpha$ ]<sub>D</sub><sup>20</sup> +42.1 (c = 0.8, CHCl<sub>3</sub>);  $\nu_{\max}$  /cm<sup>-1</sup> (film) 2978 (m), 2931 (m), 1688 (s), 1384 (m), 1245 (s), 1104 (s);  $\delta_{\text{H}}$  (400 MHz, CDCl<sub>3</sub>) 0.79 (3H, d, *J* = 7.0, C5-CH<sub>3</sub>), 1.18 (3H, d, *J* = 6.5, OCH(CH<sub>3</sub>)<sub>2</sub>), 1.23 (3H, d, *J* = 6.0, OCH(CH<sub>3</sub>)<sub>2</sub>), 1.30–1.38 (6H, m, OCH(CH<sub>3</sub>)<sub>2</sub>), 2.85 (3H, d, *J* = 1.5, NCH<sub>3</sub>), 3.16 (1H, dd, *J* = 22.5 and 5.0, C3-H), 3.87 (1H, ddd, *J* = 19.0, 7.0 and 5.0, C4-H), 4.05 (1H, qd, *J* = 7.0 and 7.0, C5-H), 4.63–4.87 (2H, m, OCH(CH<sub>3</sub>)<sub>2</sub>), 7.10–7.15 (2H, m, ArCH), 7.22–7.33 (3H, m, ArCH);  $\delta_{\text{C}}$  (100 MHz, CDCl<sub>3</sub>) 15.6 (C5-CH<sub>3</sub>), 23.6–24.7 (m, OCH(CH<sub>3</sub>)<sub>2</sub>), 27.9 (NCH<sub>3</sub>), 44.7 (C-4), 48.5 (d, <sup>1</sup>*J*<sub>PC</sub> = 141.0, C-3), 57.9 (d, <sup>3</sup>*J*<sub>PC</sub> = 4.5, C-5), 71.1 (d, <sup>2</sup>*J*<sub>PC</sub> = 7.0, OCH(CH<sub>3</sub>)<sub>2</sub>  $\times$  4), 72.1 (d, <sup>2</sup>*J*<sub>PC</sub> = 7.0, OCH(CH<sub>3</sub>)<sub>2</sub>), 127.4, 128.3 and 128.5 (ArCH  $\times$  5), 139.5 (d, <sup>3</sup>*J*<sub>PC</sub> = 9.0, ArC), 169.5 (d, <sup>2</sup>*J*<sub>PC</sub> = 4.0, C-2);  $\delta_{\text{P}}$  (162 MHz, CDCl<sub>3</sub>) 21.7; *m/z* (CI<sup>+</sup>) 354 ([M+H]<sup>+</sup>, 100 %); HRMS: (CI<sup>+</sup>) Found: [M+H]<sup>+</sup> 354.1831, C<sub>18</sub>H<sub>29</sub>NO<sub>4</sub>P requires 354.1834.

**(3R\*,4S\*)-Diisopropyl(1,4-dibenzyl-2-oxo-pyrrolidin-3-yl)-phosphonate (19) and Benzyl((E)-3-phenylallyl)amine (21):**

To a solution of diisopropyl ethyl phosphonoacetate **4** (238  $\mu$ L, 1.00 mmol) in anhydrous *p*-dioxane (4.3 mL) was added *t*-BuOK (112 mg, 1.00 mmol) and the mixture was stirred at r.t. for 40 minutes to form a colourless solution. Cyclic sulfamidate **12** (150 mg, 0.50 mmol) was added and the mixture was heated at reflux for 15 h. After cooling to r.t., aq. 5 M HCl (0.50 mL) was added and the mixture was stirred at r.t. for 3 h. The mixture was neutralised with saturated aq. NaHCO<sub>3</sub> and then concentrated *in vacuo*. The residue was dissolved in brine (20 mL) and CH<sub>2</sub>Cl<sub>2</sub> (15 mL), the organic portion was isolated and the aqueous portion was extracted with CH<sub>2</sub>Cl<sub>2</sub> (2  $\times$  15 mL). The combined organic extracts were dried (Na<sub>2</sub>SO<sub>4</sub>) and concentrated *in vacuo* to afford a pale yellow oil. This was dissolved in PhMe (5 mL) and heated at reflux for 2 h. The mixture was cooled to r.t., concentrated *in vacuo* and purified by FCC (EtOAc-MeOH 1:0 – 9:1) to afford phosphonate **19** (121 mg, 58 %) and subsequently allylic amine **21** (7 mg, 7 %) as colourless oils.

Data for lactam **19**:  $\nu_{\max}$  /cm<sup>-1</sup> (film) 2980 (m), 2932 (m), 1690 (s), 1386 (m), 1247 (s), 1104 (s);  $\delta_{\text{H}}$  (400 MHz, CDCl<sub>3</sub>) 1.26–1.36 (12H, m, OCH(CH<sub>3</sub>)<sub>2</sub>), 2.52–2.60 (1H, m, C4-CH<sub>2</sub>Ph), 2.73 (1H, dd, *J* = 22.0 and 3.5, C3-H), 2.85–2.92 (3H, m, C4-CH<sub>2</sub>Ph, C4-H and C5-H), 3.40 (1H, dd, *J* = 10.0 and 7.0, C5-H), 4.41 (1H, d, *J* = 15.0, NCH<sub>2</sub>Ph), 4.50 (1H, d, *J* = 15.0, NCH<sub>2</sub>Ph), 4.70–4.87 (2H, m, OCH(CH<sub>3</sub>)<sub>2</sub>), 7.00–7.04 (2H, m, ArCH), 7.16–7.37 (8H, m, ArCH);  $\delta_{\text{C}}$  (100 MHz, CDCl<sub>3</sub>) 23.6–24.4 (m, OCH(CH<sub>3</sub>)<sub>2</sub>  $\times$  4), 35.3 (C-4), 40.8 (d, <sup>3</sup>*J*<sub>PC</sub> = 11.0, C4-CH<sub>2</sub>Ph), 46.8 (NCH<sub>2</sub>Ph), 48.2 (d, <sup>1</sup>*J*<sub>PC</sub> = 140.0, C-3), 49.9 (C-5), 71.1 (d, <sup>2</sup>*J*<sub>PC</sub> = 7.5, OCH(CH<sub>3</sub>)<sub>2</sub>), 71.8 (d, <sup>2</sup>*J*<sub>PC</sub> = 7.5, OCH(CH<sub>3</sub>)<sub>2</sub>), 126.7, 127.7, 128.2, 128.6, 128.7 and 129.1 (ArCH  $\times$  10), 136.2 and 138.3 (ArC), 168.8 (d, <sup>2</sup>*J*<sub>PC</sub> = 4.0, C-2);  $\delta_{\text{P}}$  (162 MHz, CDCl<sub>3</sub>) 21.9; *m/z* (CI<sup>+</sup>) 430 ([M+H]<sup>+</sup>, 100 %); HRMS: (CI<sup>+</sup>) Found: [M+H]<sup>+</sup> 430.2141, C<sub>24</sub>H<sub>33</sub>NO<sub>4</sub>P requires 430.2147.

Data for allylic amine **21**:  $\delta_{\text{H}}$  (400 MHz, CDCl<sub>3</sub>) 1.63 (1H, br s, NH), 3.42 (2H, d, *J* = 6.0, C1-H), 3.82 (2H, s, NCH<sub>2</sub>Ph), 6.30 (1H, d, *J* = 16.0 and 6.0, C2-H), 6.53 (1H, d, *J* = 16.0, C3-H), 7.18–7.39 (10H, m, ArCH); *m/z* (CI<sup>+</sup>) 224 ([M+H]<sup>+</sup>, 100 %). The spectroscopic properties of this compound were consistent with the data available in the literature (J. Blid, P. Brandt and P. Somfai, *J. Org. Chem.*, 2004, **69**, 3043–3049.)

**Diisopropyl(1-benzyl-6-methyl-2-oxopiperidin-3-yl)phosphonate (20):** To a solution of diisopropyl ethyl phosphonoacetate **4** (195  $\mu$ L, 0.82 mmol) in anhydrous *p*-dioxane

(4.0 mL) was added *t*-BuOK (92 mg, 0.82 mmol) and the mixture was stirred at r.t. for 40 minutes to form a colourless solution. Cyclic sulfamidate **13** (100 mg, 0.41 mmol) was added and the mixture was heated at reflux for 15 h. After cooling to r.t., aq. 5 M HCl (0.41 mL) was added and the mixture was stirred at r.t. for 3 h. The mixture was neutralised with saturated aq. NaHCO<sub>3</sub> and then concentrated *in vacuo*. The residue was dissolved in brine (20 mL) and CH<sub>2</sub>Cl<sub>2</sub> (15 mL), the organic portion was isolated and the aqueous portion was extracted with CH<sub>2</sub>Cl<sub>2</sub> (2 × 15 mL). The combined organic extracts were dried (Na<sub>2</sub>SO<sub>4</sub>) and concentrated *in vacuo* to afford a pale yellow oil. This was dissolved in *p*-xylene (7.5 mL) and heated at reflux for 18 h. The mixture was cooled to r.t., concentrated *in vacuo* and purified by FCC (EtOAc-MeOH 1:0 – 9:1) to afford phosphonate **20** (73 mg, 50 %, 3:2 d.r. *A*:*B*) as a colourless oil;  $\nu_{\max}$  / cm<sup>-1</sup> (film) 2977 (m), 2925 (m), 1635 (s), 1450 (m), 1245 (s), 1106 (s);  $\delta_{\text{H}}$  (400 MHz, CDCl<sub>3</sub>) 1.18-1.41 (30H, m, OCH(CH<sub>3</sub>)<sub>2</sub> and C6-CH<sub>3</sub> of *A* and *B*), 1.43-1.54 (1H, m, C4-H of *B*), 1.70-1.86 (2H, m, C4-H of *A*), 1.93-2.08 (1H, m, C5-H of *A*), 2.09-2.37 (4H, m, C5-H of *A* and *B* and C4-H of *B*), 2.91-3.12 (2H, m, C3-H of *A* and *B*), 3.40-3.52 (2H, m, C6-H of *A* and *B*), 3.94 (1H, d, *J* = 15.5, NCH<sub>2</sub>Ph of *B*), 4.19 (1H, d, *J* = 15.0, NCH<sub>2</sub>Ph of *A*), 4.65-4.90 (4H, m, OCH(CH<sub>3</sub>)<sub>2</sub> of *A* and *B*), 5.14 (1H, d, *J* = 15.0, NCH<sub>2</sub>Ph of *A*), 5.50 (1H, d, *J* = 15.5, NCH<sub>2</sub>Ph of *B*), 7.19-7.34 (10H, m, ArCH);  $\delta_{\text{C}}$  (100 MHz, CDCl<sub>3</sub>) 19.3 and 19.6 (C6-CH<sub>3</sub> of *A* and *B*), 19.6 (d, <sup>3</sup>*J*<sub>PC</sub> = 4.0, C-5), 19.9 (d, <sup>3</sup>*J*<sub>PC</sub> = 4.0, C-5), 23.8-24.5 (m, OCH(CH<sub>3</sub>)<sub>2</sub> of *A* and *B*), 27.9 and 28.9 (C-4), 42.2 (d, <sup>1</sup>*J*<sub>PC</sub> = 136.0, C-3 of *B*), 42.4 (d, <sup>1</sup>*J*<sub>PC</sub> = 138.0, C-3 of *A*), 47.0 (NCH<sub>2</sub>Ph of *B*), 48.2 (NCH<sub>2</sub>Ph of *A*), 50.8 and 51.7 (C-6 of *A* and *B*), 70.8 (d, <sup>2</sup>*J*<sub>PC</sub> = 7.0, OCH(CH<sub>3</sub>)<sub>2</sub>), 71.6 (d, <sup>2</sup>*J*<sub>PC</sub> = 7.0, OCH(CH<sub>3</sub>)<sub>2</sub>), 127.1 (2 signals), 127.7 (2 signals) and 128.5 (2 signals) (ArCH × 10), 137.4 and 137.7 (ArC × 2), 165.4-165.7 (m, C-2 of *A* and *B*);  $\delta_{\text{P}}$  (162 MHz, CDCl<sub>3</sub>) 24.3 (*B*) and 23.7 (*A*); *m/z* (CI<sup>+</sup>) 368 ([M+H]<sup>+</sup>, 100 %); HRMS: (CI<sup>+</sup>) Found: [M+H]<sup>+</sup> 368.1988, C<sub>19</sub>H<sub>31</sub>NO<sub>4</sub>P requires 368.1990.

**(3Z) and (3E) (5S)-1,5-Dibenzylethylidenepyrrolidin-2-one (23):**

Procedure A (from ethyl phosphonate **14**): To a solution of phosphonate **14** (207 mg, 0.52 mmol) in anhydrous THF (4 mL) was added NaH (60 % dispersion in mineral oil, 22 mg, 0.54 mmol) and the mixture was stirred at r.t. for 15 minutes. The mixture was then cooled to -78 °C, acetaldehyde (56  $\mu$ L, 0.50 mmol) was added in one portion *via* syringe and the resulting solution was warmed to r.t. and stirred for 2.5 h. The mixture was concentrated *in vacuo* and the resulting residue was dissolved in water (10 mL) and Et<sub>2</sub>O (25 mL). The organic portion was isolated, washed with water (10 mL), dried (Na<sub>2</sub>SO<sub>4</sub>) and concentrated *in vacuo* to afford a pale yellow oil. Purification by FCC (Et<sub>2</sub>O-hexanes 1:1) afforded *Z*-**23** (57 mg, 37 %) and subsequently *E*-**23** (57 mg, 38 %) as pale yellow oils.

Procedure B (from isopropyl phosphonate **16**): To a solution of phosphonate **16** (106 mg, 0.25 mmol) in anhydrous THF (2.5 mL) was added NaH (60 % dispersion in mineral oil, 11 mg, 0.26 mmol) and the mixture was stirred at r.t. for 15 minutes. The mixture was then cooled to -78 °C, acetaldehyde (28  $\mu$ L, 0.50 mmol) was added in one portion *via* syringe and the resulting solution was warmed to r.t. and stirred for 2 h. The mixture was diluted with brine (15 mL), extracted with CH<sub>2</sub>Cl<sub>2</sub> (3 × 15 mL) and the combined organic extracts were dried (Na<sub>2</sub>SO<sub>4</sub>) and concentrated *in vacuo* to afford an orange semi-solid. This residue was purified by FCC (hexanes-EtOAc 2:1) to afford *Z*-**23** (10 mg, 14 %) and subsequently *E*-**23** (40 mg, 55 %) as colourless oils.

Data for *E*-**23**:  $[\alpha]_{\text{D}}^{20}$  -36.4 (*c* = 0.4, CHCl<sub>3</sub>);  $\nu_{\max}$  / cm<sup>-1</sup> (film) 2922 (m), 1687 (s), 1665 (s), 1414 (s), 1257 (m), 1080 (m);  $\delta_{\text{H}}$  (400 MHz, CDCl<sub>3</sub>) 1.71 (3H, d, *J* = 7.0, C3-CHCH<sub>3</sub>), 2.35 (1H, d, *J* = 16.5, C4-H), 2.40-2.56 (2H, m, C4-H and C5-CH<sub>2</sub>Ph), 3.14 (1H, dd, *J* = 13.5 and 4.0, C5-CH<sub>2</sub>Ph), 3.64-3.73 (1H, m, C5-H), 4.12 (1H, d, *J* = 15.0, NCH<sub>2</sub>Ph), 5.17 (1H, d, *J* = 15.0, NCH<sub>2</sub>Ph), 6.50-6.60 (1H, m, C3-CH), 7.05 (2H, d, *J* = 7.0, ArCH), 7.19-7.37 (8H, m, ArCH);  $\delta_{\text{C}}$  (100 MHz, CDCl<sub>3</sub>) 14.7 (C3-CHCH<sub>3</sub>), 28.2 (C-4), 40.1 (C5-CH<sub>2</sub>Ph), 44.9 (NCH<sub>2</sub>Ph), 55.4 (C-5), 126.8, 127.7, 128.3, 128.7, 128.8 and 129.2 (ArCH × 10), 128.5 (C3-CH), 131.6, 136.8 and 137.1 (ArC × 2 and C-3), 168.7 (C-2); *m/z* (CI<sup>+</sup>) 292 ([M+H]<sup>+</sup>, 100 %); HRMS: (CI<sup>+</sup>) Found: [M+H]<sup>+</sup> 292.1700, C<sub>20</sub>H<sub>22</sub>NO requires 292.1701.

Data for **Z-23**:  $[\alpha]_D^{20}$  -45.0 ( $c = 0.8$ ,  $\text{CHCl}_3$ );  $\nu_{\text{max}} / \text{cm}^{-1}$  (film) 2923 (m), 1692 (s), 1669 (s), 1414 (s), 1249 (s), 1029 (m);  $\delta_{\text{H}}$  (400 MHz,  $\text{CDCl}_3$ ) 2.18 (3H, d,  $J = 7.5$ , C3-CHCH<sub>3</sub>), 2.34 (1H, d,  $J = 16.0$ , C4-H), 2.45 (1H, dd,  $J = 13.0$  and 9.0, C5-CH<sub>2</sub>Ph), 2.53 (1H, dddd,  $J = 16.0$ , 8.0, 2.5 and 2.5, C4-H), 3.06 (1H, dd,  $J = 13.0$  and 4.0, C5-CH<sub>2</sub>Ph), 3.60 (1H, m, C5-H), 4.05 (1H, d,  $J = 15.0$ , NCH<sub>2</sub>Ph), 5.13 (1H, d,  $J = 15.0$ , NCH<sub>2</sub>Ph), 5.84-5.92 (1H, m, C3-CH), 7.03 (2H, d,  $J = 7.0$ , ArCH), 7.17-7.37 (8H, m, ArCH);  $\delta_{\text{C}}$  (100 MHz,  $\text{CDCl}_3$ ) 13.5 (C3-CHCH<sub>3</sub>), 32.3 (C-4), 39.9 (C5-CH<sub>2</sub>Ph), 44.5 (NCH<sub>2</sub>Ph), 55.4 (C-5), 126.7, 127.6, 128.3, 128.6, 128.8, 129.3 and 129.4 (ArCH  $\times 10$  and C-3), 132.3 (C3-CH), 137.0 and 137.3 (ArC  $\times 2$ ), 169.0 (C-2);  $m/z$  ( $\text{CI}^+$ ) 292 ( $[\text{M}+\text{H}]^+$ , 100 %); HRMS: ( $\text{CI}^+$ ) Found:  $[\text{M}+\text{H}]^+$  292.1697,  $\text{C}_{20}\text{H}_{22}\text{NO}$  requires 292.1701.

**(3E)- and (3Z)- (5S)-1,5-Dibenzyl-3-butyldenepyrrolidin-2-one (24)**: To a suspension of NaH (60 % dispersion in mineral oil, 32 mg, 0.80 mmol) in anhydrous THF (2 mL) was added phosphonate **14** (301 mg, 0.75 mmol) as a solution in anhydrous THF (3 mL). The mixture was then cooled to  $-78^\circ\text{C}$ , and butanal (90  $\mu\text{L}$ , 1.00 mmol) was then added. The mixture was stirred and allowed to warm to r.t. After 5 h the mixture was diluted with Et<sub>2</sub>O (40 mL) and water (40 mL), and the phases separated. The aqueous portion was extracted with Et<sub>2</sub>O ( $2 \times 40$  mL) and the combined organic extracts were dried ( $\text{Na}_2\text{SO}_4$ ) and concentrated *in vacuo*. Purification by FCC (petrol-Et<sub>2</sub>O 5:1 to 2:1) afforded (**Z**)-**24** (100 mg, 42 %) and subsequently (**E**)-**24** (104 mg, 43 %) as colourless oils.

Data for **Z-24**:  $[\alpha]_D^{20}$  -73 ( $c = 1$ ,  $\text{CHCl}_3$ );  $\nu_{\text{max}} / \text{cm}^{-1}$  (film) 2959 (m), 1686 (s), 1663 (s), 1418 (s), 1256 (m);  $\delta_{\text{H}}$  (400 MHz,  $\text{CDCl}_3$ ) 0.93 (3H, t,  $J = 7.5$ , CH<sub>3</sub>), 1.41 (2H, sextet,  $J = 7.5$ , CH<sub>2</sub>CH<sub>3</sub>), 2.35 (1H, dd,  $J = 16.0$  and 1.5, C4-H), 2.46 (1H, dd,  $J = 13.0$  and 9, C5-CH<sub>2</sub>Ph), 2.53 (1H, ddd,  $J = 16.0$ , 8.0 and 1.5, C4-H), 2.65-2.84 (2H, m, CH<sub>2</sub>CH<sub>2</sub>CH<sub>3</sub>), 3.05 (1H, dd,  $J = 13.5$  and 4.0, C5-CH<sub>2</sub>Ph), 3.60 (1H, m, C5-H), 4.04 (1H, d,  $J = 15.0$ , NCH<sub>2</sub>Ph), 5.13 (1H, d,  $J = 15.0$ , NCH<sub>2</sub>Ph), 5.79 (1H, tt,  $J = 8.0$  and 2.0, C=CH), 7.00-7.06 (2H, m, ArCH), 7.16-7.37 (8H, m, ArCH);  $\delta_{\text{C}}$  (75 MHz,  $\text{CDCl}_3$ ) 13.7 (CH<sub>3</sub>), 22.8 (CH<sub>2</sub>CH<sub>3</sub>), 28.9 (CH<sub>2</sub>CH<sub>2</sub>CH<sub>3</sub>), 32.0 (C-4), 39.6 (C5-CH<sub>2</sub>Ph), 44.3 (NCH<sub>2</sub>Ph), 55.1 (C-5), 126.5, 127.4, 128.1, 128.4, 128.6 and 129.1 (ArCH  $\times 10$  and C-3, only 6 signals observed), 136.8 and 137.0 (ArC  $\times 2$ ), 137.6 (C=CH), 168.6 (C-2);  $m/z$  ( $\text{CI}^+$ ) 320 ( $[\text{M}+\text{H}]^+$ , 100 %); HRMS: ( $\text{CI}^+$ ) Found:  $[\text{M}+\text{H}]^+$  320.2015,  $\text{C}_{22}\text{H}_{26}\text{NO}$  requires 320.2014.

Data for **E-24**:  $[\alpha]_D^{20}$  -61 ( $c = 1$ ,  $\text{CHCl}_3$ );  $\nu_{\text{max}} / \text{cm}^{-1}$  (film) 2960 (m), 2930 (m), 1692 (s), 1672 (s), 1419 (s);  $\delta_{\text{H}}$  (400 MHz,  $\text{CDCl}_3$ ) 0.90 (3H, t,  $J = 7.5$ , CH<sub>3</sub>), 1.44 (2H, sextet,  $J = 7.5$ , CH<sub>2</sub>CH<sub>3</sub>), 1.99-2.08 (2H, m, CH<sub>2</sub>CH<sub>2</sub>CH<sub>3</sub>), 2.34 (1H, d,  $J = 16.0$ , C4-H), 2.42-2.55 (2H, m, C4-H and C5-CH<sub>2</sub>Ph), 3.12 (1H, dd,  $J = 13.0$  and 4.0, C5-CH<sub>2</sub>Ph), 3.68 (1H, m, C5-H), 4.13 (1H, d,  $J = 15.0$ , NCH<sub>2</sub>Ph), 5.15 (1H, d,  $J = 15.0$ , NCH<sub>2</sub>Ph), 6.49 (1H, tt,  $J = 8.0$  and 3.0, C=CH), 7.01-7.07 (2H, m, ArCH), 7.18-7.37 (8H, m, ArCH);  $\delta_{\text{C}}$  (75 MHz,  $\text{CDCl}_3$ ) 13.8 (CH<sub>3</sub>), 21.7 (CH<sub>2</sub>CH<sub>3</sub>), 28.1 (C-4), 31.1 (CH<sub>2</sub>CH<sub>2</sub>CH<sub>3</sub>), 39.9 (C5-CH<sub>2</sub>Ph), 44.7 (NCH<sub>2</sub>Ph), 55.3 (C-5), 126.6, 127.5, 128.2, 128.5, 128.6 and 129.1 (ArCH  $\times 10$  and C-3, only 6 signals observed), 130.5 (ArC), 133.6 (C=CH), 136.7 (ArC), 168.7 (C-2);  $m/z$  ( $\text{CI}^+$ ) 320 ( $[\text{M}+\text{H}]^+$ , 100 %); HRMS: ( $\text{CI}^+$ ) Found:  $[\text{M}+\text{H}]^+$  320.2013,  $\text{C}_{22}\text{H}_{26}\text{NO}$  requires 320.2014.

**(3Z) and (3E) (4R,5S)-Ethylidene-1,5-dimethyl-4-phenyl-pyrrolidin-2-one (26)**: To a solution of phosphonate **17** (102 mg, 0.29 mmol) in anhydrous THF (2.5 mL) was added NaH (60 % dispersion in mineral oil, 13 mg, 0.32 mmol) and the mixture was stirred at r.t. for 15 minutes. The mixture was then cooled to  $-78^\circ\text{C}$  and acetaldehyde (33  $\mu\text{L}$ , 0.58 mmol) was added in one portion *via* syringe and the resulting solution was warmed to r.t. and stirred for 5.5 h. The mixture was diluted with brine (20 mL), extracted with CH<sub>2</sub>Cl<sub>2</sub> ( $3 \times 15$  mL) and the combined organic extracts were dried ( $\text{Na}_2\text{SO}_4$ ) and concentrated *in vacuo* to afford a colourless oil. This residue was purified by FCC (hexanes-EtOAc 1:1) to afford **Z-26** (35 mg, 56 %) as a colourless oil and subsequently **E-26** which was inseparable from oxidation product **27** (8 mg, 3:1 **E-26:27**) as a colourless oil.

Data for **Z-26**:  $[\alpha]_D^{20}$  +62.2 ( $c = 0.5$ ,  $\text{CHCl}_3$ );  $\nu_{\text{max}} / \text{cm}^{-1}$  (film) 1912 (m), 1737 (m), 1688 (s), 1668 (s), 1393 (m), 1231 (m);  $\delta_{\text{H}}$  (270 MHz,  $\text{CDCl}_3$ ) 1.26 (3H, d,  $J = 6.0$ , C5-CH<sub>3</sub>), 2.18 (3H, dd,  $J = 7.5$  and 2.5, C3-CHCH<sub>3</sub>), 2.90 (3H, s, NCH<sub>3</sub>), 3.37-3.51 (2H, m, C4-H

and C5-H), 5.63 (1H, qd,  $J = 7.5$  and  $2.0$ , C3-CH), 7.14-7.38 (5H, m, ArCH);  $\delta_C$  (100 MHz, CDCl<sub>3</sub>) 12.9 (C3-CHCH<sub>3</sub>), 18.5 (C5-CH<sub>3</sub>), 26.9 (NCH<sub>3</sub>), 52.9 and 61.2 (C-4 and C-5), 126.7, 128.1 and 128.3 (ArCH  $\times$  5), 133.2 (C3-CH), 134.5 and 141.7 (ArC and C-3), 168.0 (C-2);  $m/z$  (CI<sup>+</sup>) 216 ([M+H]<sup>+</sup>, 100 %); HRMS: (CI<sup>+</sup>) Found: [M+H]<sup>+</sup> 216.1379, C<sub>14</sub>H<sub>18</sub>NO requires 216.1388. Geometric assignment of this compound was based upon a diagnostic field gradient nOe observed between C4-H and C3-CH.

Data for *E*-**26**:  $\delta_H$  (400 MHz, CDCl<sub>3</sub>) 1.32 (3H, d,  $J = 9.5$ , C5-CH<sub>3</sub>), 1.48 (3H, dd,  $J = 10.5$  and  $2.5$ , C3-CHCH<sub>3</sub>), 2.92 (3H, s, NCH<sub>3</sub>), 3.34-3.43 (1H, m, C5-H), 3.56-3.62 (1H, m, C4-H), 6.70 (1H, qd,  $J = 10.5$  and  $4.0$ , C3-CHCH<sub>3</sub>), 7.14-7.46 (5H, m, ArCH);  $m/z$  (CI<sup>+</sup>) 216 ([M+H]<sup>+</sup>, 100 %). Full characterisation is not given as this material could not be obtained in pure form (*vide supra*). Geometric assignment of this compound was based upon a diagnostic field gradient nOe observed between C4-H and C3-CHCH<sub>3</sub>.

**2,4,6-Trivinylcyclotriboroxane pyridyl complex:** To a solution of trimethylborate (10.0 mL, 84.9 mmol) in anhydrous THF (75 mL) at -78 °C was added dropwise, *via* cannula, a solution of vinyl magnesium bromide (1.0 M, 50.0 mmol) over 45 minutes. The mixture was stirred at -78 °C for 1.25 h and then aq. 1 M HCl (25 mL) was added dropwise over 5 minutes to form a fine, colourless precipitate. The mixture was warmed to r.t., diluted with brine (20 mL) and extracted with Et<sub>2</sub>O (4  $\times$  50 mL). The combined organic extracts were washed with water (2  $\times$  50 mL), brine (50 mL), dried (Na<sub>2</sub>SO<sub>4</sub>) and concentrated *in vacuo* to ca. 25 mL. Pyridine (10 mL) was added and the mixture was stirred at r.t. for 4 h. Concentration *in vacuo* and then Kugelrohr distillation (ca. 75 °C, 0.01 mmHg) afforded the vinyl boroxane (2.92 g, 73 %) as a colourless solid; m.p. 47-49 °C (CH<sub>2</sub>Cl<sub>2</sub>-hexanes) [Lit., 46-48 °C];  $\delta_H$  (400 MHz, CDCl<sub>3</sub>) 5.81 (3H, dd,  $J = 11.0$  and  $7.0$ ), 5.98-6.04 (6H, m), 7.63 (2H, dd,  $J = 7.0$ ), 8.04 (1H, t,  $J = 7.0$ ), 8.83 (2H, d,  $J = 5.0$ );  $\delta_C$  (100 MHz, CDCl<sub>3</sub>) 125.4, 131.4, 138.1 (br), 140.8 and 144.0;  $\delta_B$  (96 MHz, CDCl<sub>3</sub>) 18.9. The spectroscopic properties of this compound were consistent with the data available in the literature.<sup>12</sup>

**(*S*)-1,5-Dibenzyl-3-(3-nitrophenyl)-1,5-dihydropyrrol-2-one (32):** A solution of vinyl triflate **29** (40 mg, 0.10 mmol), K<sub>3</sub>PO<sub>4</sub> (32 mg, 0.15 mmol), 3-nitrobenzene boronic acid (18 mg, 0.11 mmol) and freshly prepared Pd(PPh<sub>3</sub>)<sub>4</sub> (6 mg, 5 mol %) in *p*-dioxane (1.5 mL) and water (0.5 mL) was heated under microwave conditions for 5 minutes (90 °C max, 150 W, Powermax). The mixture was cooled to r.t. and extracted with Et<sub>2</sub>O (4  $\times$  2 mL). The combined organic extracts were dried (Na<sub>2</sub>SO<sub>4</sub>) and concentrated *in vacuo* to afford a yellow oil. This residue was purified by FCC (petrol-Et<sub>2</sub>O 3:1-2:1) to yield arylated lactam **32** (28 mg, 73 %) as an amorphous yellow solid; m.p. 98-99 °C (Et<sub>2</sub>O-petrol);  $[\alpha]_D^{20}$  -36.4 ( $c = 1.7$ , CHCl<sub>3</sub>);  $\nu_{\max}$  / cm<sup>-1</sup> (film) 3029 (w), 1678 (s), 1525 (s), 1409 (m), 1347 (s), 1078 (m);  $\delta_H$  (400 MHz, CDCl<sub>3</sub>) 2.59 (1H, dd,  $J = 13.0$  and  $9.0$ , C5-CH<sub>2</sub>Ph), 3.21 (1H, dd,  $J = 13.0$  and  $5.0$ , C5-CH<sub>2</sub>Ph), 4.10-4.17 (1H, m, C5-H), 4.20 (1H, d,  $J = 15.0$ , NCH<sub>2</sub>Ph), 5.23 (1H, d,  $J = 15.0$ , NCH<sub>2</sub>Ph), 7.05 (2H, d,  $J = 7.0$ , ArCH), 7.13 (1H, d,  $J = 1.5$ , C4-H), 7.18-7.32 (7H, m, ArCH), 7.49 (1H, dd,  $J = 8.5$ , ArCH), 8.10 (1H, d,  $J = 8.5$ , ArCH), 8.23 (1H, d,  $J = 8.5$ , ArCH), 8.56 (1H, s, ArCH);  $\delta_C$  (100 MHz, CDCl<sub>3</sub>) 37.6 (C5-CH<sub>2</sub>Ph), 44.4 (NCH<sub>2</sub>Ph), 60.5 (C-5), 122.0, 123.2, 127.2, 127.8, 128.0, 128.8, 128.9, 129.0, 129.4, 133.0 (ArCH  $\times$  14), 133.1, 134.2, 135.7 (ArC  $\times$  3), 137.0 (C-3), 142.4 (C-4), 148.3 (ArC), 169.1 (C-2); HRMS: (ESI<sup>+</sup>) Found [M+H]<sup>+</sup> 385.1541, C<sub>24</sub>H<sub>21</sub>N<sub>2</sub>O<sub>3</sub> requires 385.1547. The enantiomeric purity of this compound was determined by chiral HPLC (Chiralpak AD-H, isocratic hexane - *i*-PrOH 95:5, 1.0 mL/min, 20 °C);  $t_R$  (major) = 39.1 min and  $t_R$  (minor) = 49.8 min.

**(*S*)-1,5-Dibenzyl-3-pyridin-3-yl-1,5-dihydropyrrol-2-one (33):** A solution of vinyl triflate **29** (40 mg, 0.10 mmol), K<sub>3</sub>PO<sub>4</sub> (32 mg, 0.15 mmol) and pyridine-3-boronic acid (14 mg, 0.11 mmol) and freshly prepared Pd(PPh<sub>3</sub>)<sub>4</sub> (6 mg, 5 mol %) in *p*-dioxane (1.5 mL) and water (0.5 mL) was heated under microwave conditions for 5 minutes (90 °C max, 150 W, Powermax). The mixture was cooled to r.t. and extracted with Et<sub>2</sub>O (4  $\times$  2 mL). The combined organic extracts were dried (Na<sub>2</sub>SO<sub>4</sub>) and concentrated *in vacuo* to afford a yellow oil. This residue was purified by FCC (petrol-Et<sub>2</sub>O 1:1-1:4) to yield pyridyl lactam **33** (13 mg, 38 %) as a yellow oil;  $[\alpha]_D^{20}$  -32.4 ( $c = 0.4$ , CHCl<sub>3</sub>);  $\nu_{\max}$  / cm<sup>-1</sup> (film) 3090 (w), 2922 (m), 1683 (s), 1410 (m), 1261 (m);  $\delta_H$  (400 MHz, CDCl<sub>3</sub>) 2.65 (1H, dd,  $J$

= 13.5 and 9.5, C5-CH<sub>2</sub>Ph), 3.29 (1H, dd,  $J$  = 13.5 and 5.5, C5-CH<sub>2</sub>Ph), 4.15-4.20 (1H, m, C5-H), 4.26 (1H, d,  $J$  = 15.0, NCH<sub>2</sub>Ph), 5.30 (1H, d,  $J$  = 15.0, NCH<sub>2</sub>Ph), 7.08-7.14 (3H, m, ArCH and C4-H), 7.22-7.39 (9H, m, ArCH), 8.29 (1H, dd,  $J$  = 8.0 and 1.5, ArCH), 8.56 (1H, dd,  $J$  = 4.5 and 1.5, ArCH), 8.91 (1H, s, ArCH);  $\delta_c$  (100 MHz, CDCl<sub>3</sub>) 37.9 (C5-CH<sub>2</sub>Ph), 44.5 (NCH<sub>2</sub>Ph), 60.7 (C-5), 123.7, 127.2, 127.8, 128.1, 128.8, 128.9, 129.15 (ArCH  $\times$  11), 133.7 (ArC  $\times$  2), 134.7 (ArCH), 136.0 and 137.2 (C-3 and ArC), 141.5 (C-4), 148.2 and 149.4 (ArCH  $\times$  2), 169.5 (C-2); HRMS: (ESI<sup>+</sup>) Found  $[M+H]^+$  341.1652, C<sub>23</sub>H<sub>21</sub>N<sub>2</sub>O requires 341.1648. The enantiomeric purity of this compound was determined by chiral HPLC (Chiralcel OJ-H, isocratic hexane - *i*-PrOH 80:20, 1.0 mL/min, 20 °C);  $t_R$  (major) = 28.0 min and  $t_R$  (minor) = 23.5 min.
